# Supplementary material for: Prognostic value of desmoplastic growth patterns in resected hepatocellular carcinoma
Source: Research Square preprint supplement (doi:10.21203/rs.3.rs-8135322/v1), 2025-12-08
Supplement: Supplementary file 1 [file 3abaa0a519868f071b902180.pdf]

## SUPPLEMENTARY FILE

# **Prognostic value of desmoplastic growth patterns in resected hepatocellular carcinoma**

\*Niklas Sarelin<sup>1,2</sup>, Valtteri Kairaluoma<sup>1,3</sup>, Juha Saarnio<sup>1</sup>, Joonas H. Kauppila<sup>1,4</sup>, Jan Böhm<sup>3</sup>, Heikki Huhta<sup>1</sup>, Juha P. Väyrynen<sup>1</sup>, Olli Helminen<sup>1</sup>

**Table S1.** Baseline characteristics for resected HCC stratified by having a uniformly desmoplastic histopathological growth pattern (HGP).

|                                       |                  | Uniform desmoplastic HGP |                  |              |
|---------------------------------------|------------------|--------------------------|------------------|--------------|
|                                       |                  | Yes, N=44                | No, N=30         | P-value      |
| Age, years. Median (IQR)              |                  | 70.6 (64.3-74.6)         | 68.9 (60.9-72.6) | 0.331        |
| Male. N (%)                           |                  | 31 (70.5%)               | 15 (50.0%)       | 0.075        |
| Charlson Comorbidity Index. Mean (SD) |                  | 1.2 (0.9)                | 1.4 (0.9)        | 0.515        |
| Cirrhosis. N (%)                      |                  | 17 (38.6%)               | 16 (53.3%)       | 0.212        |
| Child-Pugh Score. N (%)               | A                | 31 (77.5%)               | 27 (90.0%)       | 0.173        |
|                                       | B                | 9 (22.5%)                | 3 (10.0%)        |              |
|                                       | C                | 0 (0%)                   | 0 (0%)           |              |
| Alpha-fetoprotein, µg/L. Median (IQR) |                  | 5 (3-14)                 | 6 (3-68)         | 0.916        |
| Tumour size, mm. Median (IQR)         |                  | 50 (30-60)               | 44 (27-85)       | 0.650        |
| Unifocal tumour. N (%)                |                  | 38 (86.4%)               | 22 (73.3%)       | 0.160        |
| BCLC Stage. N (%)                     | Very early (0)   | 1 (2.3%)                 | 1 (3.3%)         | 0.294        |
|                                       | Early (A)        | 39 (88.6%)               | 23 (76.7%)       |              |
|                                       | Intermediate (B) | 3 (6.8%)                 | 6 (20.0%)        |              |
|                                       | Advanced (C)     | 1 (2.3%)                 | 0 (0%)           |              |
|                                       | Terminal (D)     | 0 (0%)                   | 0 (0%)           |              |
| TNM stage. N (%)                      | Stage 1          | 32 (72.7%)               | 19 (63.3%)       | 0.399        |
|                                       | Stage 2          | 10 (22.7%)               | 9 (30.0%)        |              |
|                                       | Stage 3          | 1 (2.3%)                 | 2 (6.7%)         |              |
|                                       | Stage 4          | 1 (2.3%)                 | 0 (0%)           |              |
| Tumour grade. N (%)                   | Grade 1          | 17 (38.6%)               | 9 (30.0%)        | 0.474        |
|                                       | Grade 2          | 22 (50.0%)               | 17 (56.7%)       |              |
|                                       | Grade 3          | 5 (11.4%)                | 4 (13.3%)        |              |
| Positive resection margin. N (%)      |                  | 1 (2.4%)                 | 5 (18.5%)        | <b>0.021</b> |

**Table S2.** Baseline characteristics for resected HCC according to the minimum thickness of the desmoplastic rim.

|                                       |                  | Any amount of<br>non-dHGP<br>N=30 | Low minimum<br>thickness (<94µm)<br>N=22 | High minimum<br>thickness (≥94µm)<br>N=22 | P-value |
|---------------------------------------|------------------|-----------------------------------|------------------------------------------|-------------------------------------------|---------|
| Age, years. Median (IQR)              |                  | 68.9 (60.9-72.6)                  | 72.7 (64.0-76.1)                         | 69.2 (64.5-73.1)                          | 0.322   |
| Male. N (%)                           |                  | 15 (50.0%)                        | 18 (81.8%)                               | 13 (59.1%)                                |         |
| Charlson Comorbidity Index. Mean (SD) |                  | 1.4 (0.9)                         | 1.2 (0.9)                                | 1.3 (0.9)                                 | 0.750   |
| Cirrhosis. N (%)                      |                  | 16 (53.3%)                        | 9 (40.9%)                                | 8 (36.4%)                                 | 0.443   |
| Child-Pugh Score. N (%)               | A                | 27 (90.0%)                        | 16 (76.2%)                               | 15 (78.9%)                                | 0.385   |
|                                       | B                | 3 (10.0%)                         | 5 (23.8%)                                | 4 (21.1%)                                 |         |
|                                       | C                | 0 (0%)                            | 0 (0%)                                   | 0 (0%)                                    |         |
| Alpha-fetoprotein, µg/L. Median (IQR) |                  | 6 (3-68)                          | 7 (4-14)                                 | 4 (2-108)                                 | 0.466   |
| Tumour size, mm. Median (IQR)         |                  | 44 (27-85)                        | 41 (29-50)                               | 52 (38-90)                                | 0.339   |
| Unifocal tumour. N (%)                |                  | 22 (73.3%)                        | 18 (81.8%)                               | 20 (90.9%)                                | 0.282   |
| BCLC Stage. N (%)                     | Very early (0)   | 1 (3.3%)                          | 0 (0%)                                   | 1 (4.5%)                                  | 0.325   |
|                                       | Early (A)        | 23 (76.7%)                        | 19 (86.4%)                               | 20 (90.9%)                                |         |
|                                       | Intermediate (B) | 6 (20.0%)                         | 3 (13.6%)                                | 0 (0%)                                    |         |
|                                       | Advanced (C)     | 0 (0%)                            | 0 (0%)                                   | 1 (4.5%)                                  |         |
|                                       | Terminal (D)     | 0 (0%)                            | 0 (0%)                                   | 0 (0%)                                    |         |
| TNM stage. N (%)                      | Stage 1          | 19 (63.3%)                        | 14 (63.6%)                               | 18 (81.8%)                                | 0.343   |
|                                       | Stage 2          | 9 (30.0%)                         | 7 (31.8%)                                | 3 (13.6%)                                 |         |
|                                       | Stage 3          | 2 (6.7%)                          | 1 (4.5%)                                 | 0 (0%)                                    |         |
|                                       | Stage 4          | 0 (0%)                            | 0 (0%)                                   | 1 (4.5%)                                  |         |
| Tumour grade. N (%)                   | Grade 1          | 9 (30.0%)                         | 7 (31.8%)                                | 10 (45.5%)                                | 0.657   |
|                                       | Grade 2          | 17 (56.7%)                        | 13 (59.1%)                               | 9 (40.9%)                                 |         |
|                                       | Grade 3          | 4 (13.3%)                         | 2 (9.1%)                                 | 3 (13.6%)                                 |         |
| Positive resection margin. N (%)      |                  | 5 (18.5%)                         | 0 (0%)                                   | 1 (4.8%)                                  | 0.061   |

**Table S3.** Baseline characteristics for resected HCC according to the maximum thickness of the desmoplastic rim.

|                                       |                  | Any amount of non-dHGP<br>N=30 | Low maximum thickness (<1302 µm)<br>N=22 | High maximum thickness (≥ 1302 µm) N=22 | P-value      |
|---------------------------------------|------------------|--------------------------------|------------------------------------------|-----------------------------------------|--------------|
| Age, years. Median (IQR)              |                  | 68.9 (60.9-72.6)               | 72.5 (66.4-77.6)                         | 68.9 (64.0-73.1)                        | 0.177        |
| Male. N (%)                           |                  | 15 (50.0%)                     | 16 (72.7%)                               | 15 (68.2%)                              | 0.199        |
| Charlson Comorbidity Index. Mean (SD) |                  | 1.4 (0.9)                      | 1.0 (0.8)                                | 1.5 (0.9)                               | 0.089        |
| Cirrhosis. N (%)                      |                  | 16 (53.3%)                     | 8 (36.4%)                                | 9 (40.9%)                               | 0.443        |
| Child-Pugh Score. N (%)               | A                | 27 (90.0%)                     | 15 (78.9%)                               | 16 (76.2%)                              | 0.385        |
|                                       | B                | 3 (10.0%)                      | 4 (21.1%)                                | 5 (23.8%)                               |              |
|                                       | C                | 0 (0%)                         | 0 (0%)                                   | 0 (0%)                                  |              |
| Alpha-fetoprotein, µg/L. Median (IQR) |                  | 6 (3-68)                       | 6 (3-11)                                 | 4 (3-108)                               | 0.423        |
| Tumour size, mm. Median (IQR)         |                  | 44 (27-85)                     | 46 (29-54)                               | 50 (35-90)                              | 0.484        |
| Unifocal tumour. N (%)                |                  | 22 (73.3%)                     | 17 (77.3%)                               | 21 (95.5%)                              | 0.117        |
| BCLC Stage. N (%)                     | Very early (0)   | 1 (3.3%)                       | 0 (0%)                                   | 1 (4.5%)                                | 0.287        |
|                                       | Early (A)        | 23 (76.7%)                     | 19 (86.4%)                               | 20 (90.9%)                              |              |
|                                       | Intermediate (B) | 6 (20.0%)                      | 2 (9.1%)                                 | 1 (4.5%)                                |              |
|                                       | Advanced (C)     | 0 (0%)                         | 1 (4.5%)                                 | 0 (0%)                                  |              |
|                                       | Terminal (D)     | 0 (0%)                         | 0 (0%)                                   | 0 (0%)                                  |              |
| TNM stage. N (%)                      | Stage 1          | 19 (63.3%)                     | 14 (63.6%)                               | 18 (81.8%)                              | 0.256        |
|                                       | Stage 2          | 9 (30.0%)                      | 6 (27.3%)                                | 3 (13.6%)                               |              |
|                                       | Stage 3          | 2 (6.7%)                       | 1 (4.5%)                                 | 0 (0%)                                  |              |
|                                       | Stage 4          | 0 (0%)                         | 1 (4.5%)                                 | 1 (4.5%)                                |              |
| Tumour grade. N (%)                   | Grade 1          | 9 (30.0%)                      | 13 (59.1%)                               | 4 (18.2%)                               | <b>0.014</b> |
|                                       | Grade 2          | 17 (56.7%)                     | 8 (36.4%)                                | 14 (63.6%)                              |              |
|                                       | Grade 3          | 4 (13.3%)                      | 1 (4.5%)                                 | 4 (18.2%)                               |              |
| Positive resection margin. N (%)      |                  | 5 (18.5%)                      | 1 (4.5%)                                 | 0 (0%)                                  | 0.061        |

**Table S4.** Baseline characteristics for resected HCC according to the average thickness of the desmoplastic rim.

|                                       |                  | Any amount of<br>non-dHGP<br>N=30 | Low average<br>thickness (<516µm)<br>N=22 | High average<br>thickness (≥516m)<br>N=22 | P-value      |
|---------------------------------------|------------------|-----------------------------------|-------------------------------------------|-------------------------------------------|--------------|
| Age, years. Median (IQR)              |                  | 68.9 (60.9-72.6)                  | 73.8 (66.4-76.1)                          | 68.9 (63.8-72.6)                          | 0.088        |
| Male. N (%)                           |                  | 15 (50.0%)                        | 17 (77.3%)                                | 14 (63.6%)                                | 0.136        |
| Charlson Comorbidity Index. Mean (SD) |                  | 1.4 (0.9)                         | 0.9 (0.8)                                 | 1.6 (0.8)                                 | <b>0.011</b> |
| Cirrhosis. N (%)                      |                  | 16 (53.3%)                        | 8 (36.4%)                                 | 9 (40.9%)                                 | 0.443        |
| Child-Pugh Score. N (%)               | A                | 27 (90.0%)                        | 14 (70.0%)                                | 17 (85.0%)                                | 0.181        |
|                                       | B                | 3 (10.0%)                         | 6 (30.0%)                                 | 3 (15.0%)                                 |              |
|                                       | C                | 0 (0%)                            | 0 (0%)                                    | 0 (0%)                                    |              |
| Alpha-fetoprotein, µg/L. Median (IQR) |                  | 6 (3-68)                          | 5 (3-8)                                   | 5 (3-108)                                 | 0.379        |
| Tumour size, mm. Median (IQR)         |                  | 44 (27-85)                        | 44 (29-52)                                | 50 (35-90)                                | 0.389        |
| Unifocal tumour. N (%)                |                  | 22 (73.3%)                        | 18 (81.8%)                                | 20 (90.9%)                                | 0.282        |
| BCLC Stage. N (%)                     | Very early (0)   | 1 (3.3%)                          | 0 (0%)                                    | 1 (4.5%)                                  | 0.552        |
|                                       | Early (A)        | 23 (76.7%)                        | 20 (90.9%)                                | 19 (86.4%)                                |              |
|                                       | Intermediate (B) | 6 (20.0%)                         | 2 (9.1%)                                  | 1 (4.5%)                                  |              |
|                                       | Advanced (C)     | 0 (0%)                            | 0 (0%)                                    | 1 (4.5%)                                  |              |
|                                       | Terminal (D)     | 0 (0%)                            | 0 (0%)                                    | 0 (0%)                                    |              |
| TNM stage. N (%)                      | Stage 1          | 19 (63.3%)                        | 14 (63.6%)                                | 18 (81.8%)                                | 0.343        |
|                                       | Stage 2          | 9 (30.0%)                         | 7 (31.8%)                                 | 3 (13.6%)                                 |              |
|                                       | Stage 3          | 2 (6.7%)                          | 1 (4.5%)                                  | 0 (0%)                                    |              |
|                                       | Stage 4          | 0 (0%)                            | 0 (0%)                                    | 1 (4.5%)                                  |              |
| Tumour grade. N (%)                   | Grade 1          | 9 (30.0%)                         | 11 (50.0%)                                | 6 (27.3%)                                 | 0.146        |
|                                       | Grade 2          | 17 (56.7%)                        | 10 (45.5%)                                | 14 (54.5%)                                |              |
|                                       | Grade 3          | 4 (13.3%)                         | 1 (4.5%)                                  | 4 (18.2%)                                 |              |
| Positive resection margin. N (%)      |                  | 5 (18.5%)                         | 1 (4.8%)                                  | 0 (0%)                                    | 0.061        |
